# Supplementary material for: Attenuation of UVB-Induced Photo-Aging by Polyphenolic-Rich Spatholobus Suberectus Stem Extract Via Modulation of MAPK/AP-1/MMPs Signaling in Human Keratinocytes
Source: PubMed Central journal article supplement (PMC6627339; doi:10.3390/nu11061341), 2019-06-14
Supplement: nutrients-11-01341-s001.pdf [file nutrients-11-01341-s001.pdf]

1 SUPPLEMENTARY DATA SHEETS

2  
3  
4  
5  
6 **Attenuation of UVB-induced Photoaging by polyphenolic rich Spatholobus**  
7 **suberectus stem extract via modulation of MAPK/AP-1/MMPs signaling in**  
8 **human keratinocytes**

9  
10 **Kyoo-Ri Kwon<sup>1‡,§</sup>, Md Badrul Alam<sup>1,2,§</sup>, Peijun Zhao<sup>1</sup>, Ji-Hyun Park<sup>1</sup>, Tae-Ho Kim<sup>3</sup>, and**  
11 **Sang-Han Lee<sup>1,2\*</sup>**

12 <sup>1</sup>Department of Food Science & Biotechnology, Kyungpook National University, Daegu  
13 41566, Republic of Korea

14 <sup>2</sup>Food and Bio-Industry Research Institute, Inner Beauty/Anti-ageing Center, Kyungpook  
15 National University, Daegu 41566, Republic of Korea

16 <sup>3</sup>Biomedical Research Institute, Kyungpook National University Hospital, Daegu 41944,  
17 Republic of Korea

18  
19 **§Authors are contributed equally**

20 **Correspondence to: Dr. Sang-Han Lee,**

21 E-mail: [sang@knu.ac.kr](mailto:sang@knu.ac.kr)

22  
23 <sup>†</sup>Present address: Biomedical Research Institute, Kyungpook National University Hospital,  
24 Daegu 41944, Republic of Korea

28

29

**Table S1: List of the primer sets used in this study**

30

31

32

33

34

35

36

37

38

39

40

41

42

43

44

45

46

47

48

49

50

51

52

| <i>Gene name</i> |                | <i>Sequences</i>              |
|------------------|----------------|-------------------------------|
| <i>MMP-1</i>     | <i>forward</i> | <i>CCTAGCTACACCTTCAGTGG</i>   |
|                  | <i>reverse</i> | <i>GCCCAGTACTTATTCCCTTT</i>   |
| <i>MMP-2</i>     | <i>forward</i> | <i>GATACCCCTTTGACGGTAAGGA</i> |
|                  | <i>reverse</i> | <i>CCTTCTCCCAAGGTCCATAGC</i>  |
| <i>MMP-7</i>     | <i>forward</i> | <i>GTATGGGACATTCTCTGATCC</i>  |
|                  | <i>reverse</i> | <i>CCAATGAATGAATGAATGGATG</i> |
| <i>MMP-9</i>     | <i>forward</i> | <i>TGTACCGCTATGGTTACTCTCG</i> |
|                  | <i>reverse</i> | <i>GGCAGGGACAGTTGCTTCT</i>    |
| <i>MMP-12</i>    | <i>forward</i> | <i>CATGAACCGTGAGGATGTTGA</i>  |
|                  | <i>reverse</i> | <i>GCATGGGCTAGGATTCCACC</i>   |
| <i>TIMP-1</i>    | <i>forward</i> | <i>TGGTGGGTGGATGAGTAATG</i>   |
|                  | <i>reverse</i> | <i>CGCTGGTATAAGGTGGTCTG</i>   |
| <i>TIMP-2</i>    | <i>forward</i> | <i>ATGCACATCACCTCTGTGA</i>    |
|                  | <i>reverse</i> | <i>CTCTGTGACCCAGTCCATCC</i>   |
| <i>COL1A1</i>    | <i>forward</i> | <i>GAGGGCCAAGACGAAGACATC</i>  |
|                  | <i>reverse</i> | <i>CAGATCACGTCATCGCACAAAC</i> |
| <i>ELN</i>       | <i>forward</i> | <i>CAAGGCTGGTTACCCAACAG</i>   |
|                  | <i>reverse</i> | <i>CACCTGGGACAACCTGGAATC</i>  |
| <i>HAS2</i>      | <i>forward</i> | <i>GAGCACCAAGGTTCTGCTTC</i>   |
|                  | <i>reverse</i> | <i>CTCTCCATACGGCGAGAGTC</i>   |
| <i>Gapdh</i>     | <i>Forward</i> | <i>TTGTGATGGGTGTGAACCAC</i>   |
|                  | <i>reverse</i> | <i>ACACATTGGGGGTAGGAACA</i>   |

53

54

**Table S2: List of antibodies used in this study**

| <b>Name</b>             | <b>Catalog number</b> | <b>Company</b>                 | <b>Antigen</b> | <b>Host</b> |
|-------------------------|-----------------------|--------------------------------|----------------|-------------|
| Anti-MMP1               | sc-21731              | Santa Cruz Biotechnology, Inc. | MMP-1          | Mouse       |
| Anti-MMP-2              | BS90870               | Bioworld Technology, Inc.      | MMP-2          | Rabbit      |
| Anti-TIMP-1             | BS1697                | Bioworld Technology, Inc.      | TIMP-1         | Rabbit      |
| Anti-type I procollagen | sc-376350             | Santa Cruz Biotechnology, Inc. | COL1A1         | Mouse       |
| Anti-ELN                | BS7427                | Bioworld Technology, Inc.      | ELN (Elastin)  | Rabbit      |
| Anti-HAS2               | sc-365263             | Santa Cruz Biotechnology, Inc. | HAS2           | Mouse       |
| Anti-p-p38              | sc-166182             | Santa Cruz Biotechnology, Inc. | p38            | Mouse       |
| Anti-p38                | BS3567                | Bioworld Technology, Inc.      | p38            | Rabbit      |
| Anti-p-ERK1/2           | sc-7383               | Santa Cruz Biotechnology, Inc. | ERK            | Mouse       |
| Anti-ERK1/2             | BS 6472               | Bioworld Technology, Inc.      | ERK            | Rabbit      |
| Anti-p-JNK              | BS 4322               | Bioworld Technology, Inc.      | JNK            | Rabbit      |
| Anti-JNK                | sc-7345               | Santa Cruz Biotechnology, Inc. | JNK            | Mouse       |
| Anti-NF- B (p65)        | BS1254                | Bioworld Technology, Inc.      | NF- B (p65)    | Rabbit      |
| Anti-p-c-Jun            | BS4050                | Bioworld Technology, Inc.      | c-Jun (Y-170)  | Rabbit      |
| Anti-c-jun              | MB0004                | Bioworld Technology, Inc.      | c-Jun          | Rabbit      |
| Anti Lamin B            | Sc-6217               | Santa Cruz Biotechnology, Inc. | Lamin B        | Goat        |
| Anti- actin             | Sc-47778              | Santa Cruz Biotechnology, Inc. | -actin         | Mouse       |

55

56



58

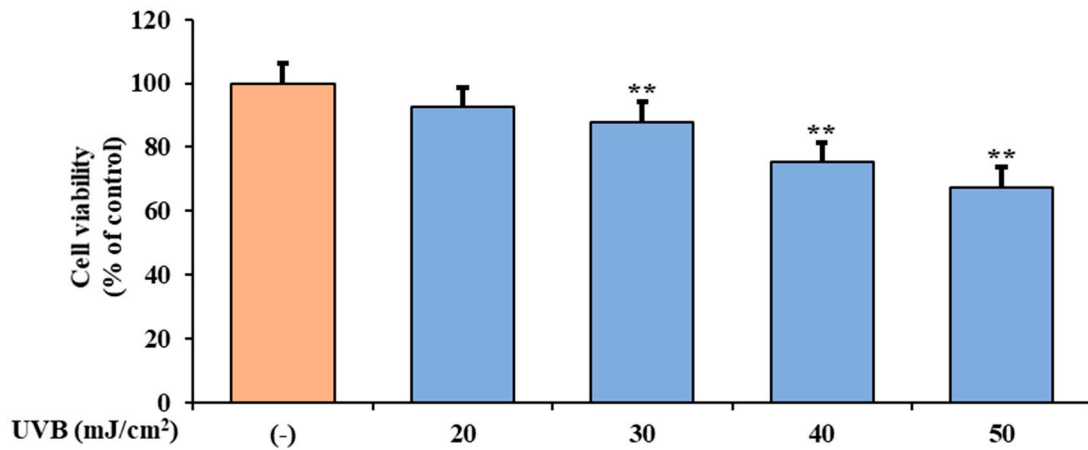

59

60 **Figure S1.** Cell viability UVB-irradiation. HaCaT cells ( $1 \times 10^5$  cells/mL) were seeded in a 96-well  
61 plate and treated with UVB-irradiation at 20,30,40 and 50 mJ/cm<sup>2</sup>. The cell viability was determined  
62 using the MTT assay.

63

64

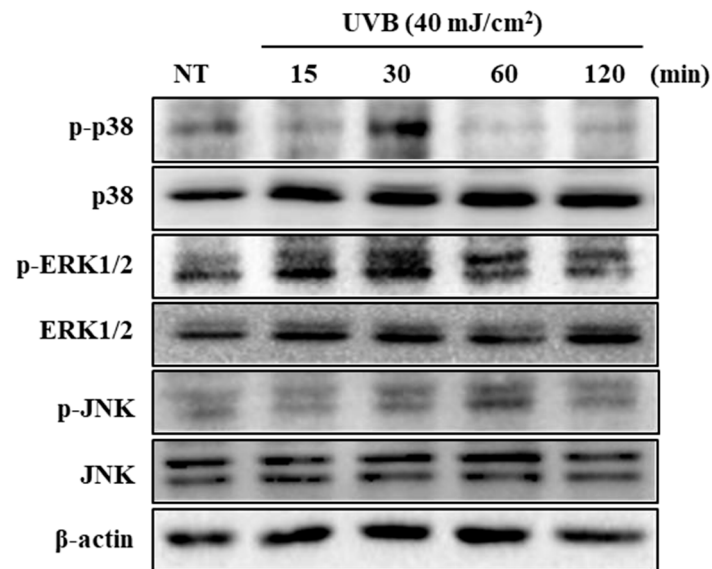

65

66 **Figure S2.** The effects of UVB-irradiation on the phosphorylation of MAP kinase in HaCaT  
67 cells. HaCaT cells ( $1 \times 10^5$  cells/mL) were seeded in a 6-well plate and treated with  
68 UVB irradiation at 40 mJ/cm<sup>2</sup> and the protein was extracted after 15, 30, 60 and 120 min Protein  
69 expression was confirmed by western blot.

70

71

72

# CompuSyn Report

**Experiment Name:** combination effect

**Date:**

**File Name:** E:\koori\combination report.cse

## Description

**Drug:** syringic acid (SA) [ug/mL]

**Drug:** Epicatechin (EP) [ug/mL]

**Drug:** Vanilic acid (VA) [ug/mL]

**Drug Combo:** combination 1 (SAEP) (SA+EP)

**Drug Combo:** combination 2 (EPVA) (EP+VA)

**Drug Combo:** combination 3 (SAVA) (SA+VA)

**Drug Combo:** combination 4 (SEV) (SA+EP+VA)

88

---

89 Data for Drug: SA [ug/mL] **Dose Effect**

0.25 0.18

0.5 0.26

1.0 0.31

90 3 data points entered.

**X-int:** 0.64112

**Y-int:** -0.3312 +/- 0.03634

**m:** 0.51665 +/- 0.09351

**Dm:** 4.37645 **r:**  
0.98401

91

---

92 Data for Drug: EP [ug/mL] **Dose Effect**

0.25 0.2

0.5 0.24

1.0 0.3

93 3 data points entered.

**X-int:** 0.95979

**Y-int:** -0.3732 +/- 0.01162

**m:** 0.38880 +/- 0.02989

**Dm:** 9.11578 **r:**  
0.99706

94

---

95 Data for Drug: VA [ug/mL] **Dose Effect**

0.25 0.15

0.5 0.2

**Dose Effect**

1.0 0.28

96 3 data points entered.

**X-int:** 0.73153  
**Y-int:** -0.4169 +/- 0.01514  
**m:** 0.56997 +/- 0.03895  
**Dm:** 5.38922 **r:**  
 0.99767

97  
 98 Data for Non-Constant Combo: SAEP (SA+EP)

**Dose SA Dose EP Effect**

1.0 9.0 0.51 1.0  
     4.0 0.45 1.0  
     2.0 0.39  
 1.0 1.0 0.38 99

4 data points entered.

100  
 101 Data for Non-Constant Combo: EPVA (EP+VA)

**Dose EP Dose VA Effect**

9.0 1.0 0.49 4.0  
     1.0 0.45 2.0  
     1.0 0.41  
 1.0 1.0 0.36 102

4 data points entered.

103  
 104 Data for Non-Constant Combo: SAVA (SA+VA)

**Dose SA Dose VA Effect**

1.0 9.0 0.52  
 1.0 4.0 0.5  
 1.0 2.0 0.55 1.0  
     1.0 0.58 2.0  
     1.0 0.57 4.0  
     1.0 0.59  
 9.0 1.0 0.62 105

7 data points entered.

106  
 107 Data for Non-Constant Combo: SEV (SA+EP+VA)

**Dose SA Dose EP Dose VA Effect**

1.0 1.0 1.0 0.51 2.0  
     1.0 1.0 0.62 1.0  
     1.0 2.0 0.54  
 1.0 2.0 1.0 0.52 108 4

data points entered.

Dose-Effect Curve for Drug Combos

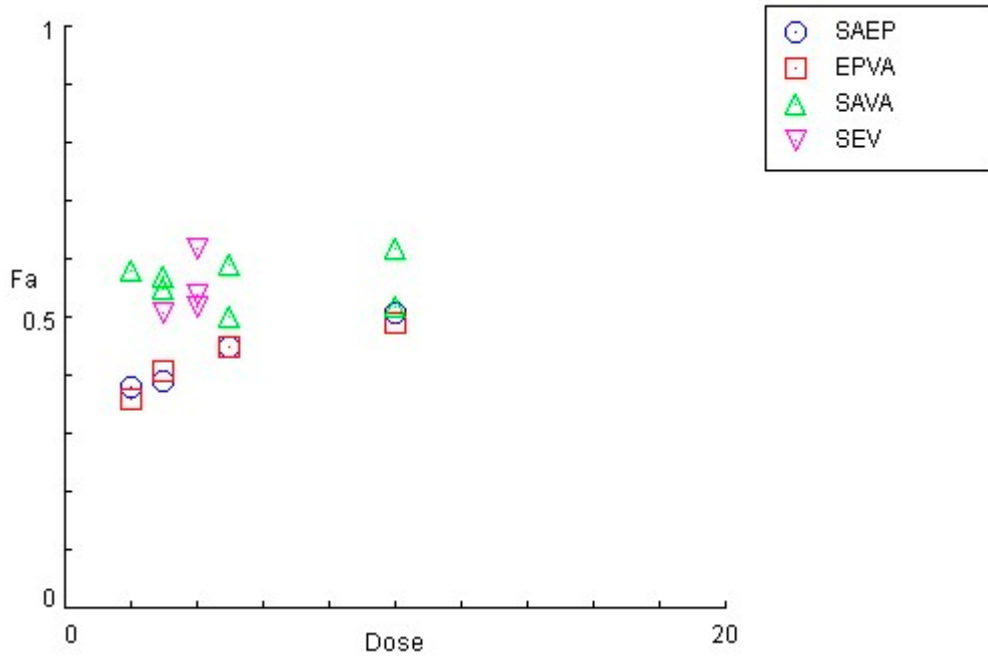

110

111

112 CI Data for Non-Constant Combo: SAEP (SA+EP)

113

| Dose SA | Dose EP | Effect | CI      |
|---------|---------|--------|---------|
| 1.0     | 9.0     | 0.51   | 1.10223 |
| 1.0     | 4.0     | 0.45   | 1.07216 |
| 1.0     | 2.0     | 0.39   | 1.23635 |
| 1.0     | 1.0     | 0.38   | 0.97577 |

114

115 CI Data for Non-Constant Combo: EPVA (EP+VA)

116

| Dose EP | Dose VA | Effect | CI      |
|---------|---------|--------|---------|
| 9.0     | 1.0     | 0.49   | 1.29334 |
| 4.0     | 1.0     | 0.45   | 0.99908 |
| 2.0     | 1.0     | 0.41   | 0.91088 |
| 1.0     | 1.0     | 0.36   | 0.99102 |

117

118 CI Data for Non-Constant Combo: SAVA (SA+VA)

119

| Dose SA | Dose VA | Effect  | CI          |
|---------|---------|---------|-------------|
| 1.0     | 9.0     | 0.52    | 1.64690     |
| 1.0     | 4.0     | 0.5     | 0.97072 1.0 |
| 2.0     | 0.55    | 0.41593 | 1.0         |
| 1.0     | 0.58    | 0.22766 | 2.0         |
| 1.0     | 0.57    | 0.37801 | 4.0         |
| 1.0     | 0.59    | 0.54983 |             |
| 9.0     | 1.0     | 0.62    | 0.87588     |



119  
 120 CI Data for Non-Constant Combo: SEV (SA+EP+VA)

| Dose SA | Dose EP | Dose VA | Effect | CI      |
|---------|---------|---------|--------|---------|
| 1.0     | 1.0     | 1.0     | 0.51   | 0.48342 |
|         | 1.0     | 1.0     | 0.62   | 0.28692 |
|         | 1.0     | 2.0     | 0.54   | 0.52027 |
| 1.0     | 2.0     | 1.0     | 0.52   | 0.53552 |

121  
 122 Combination Index Plot

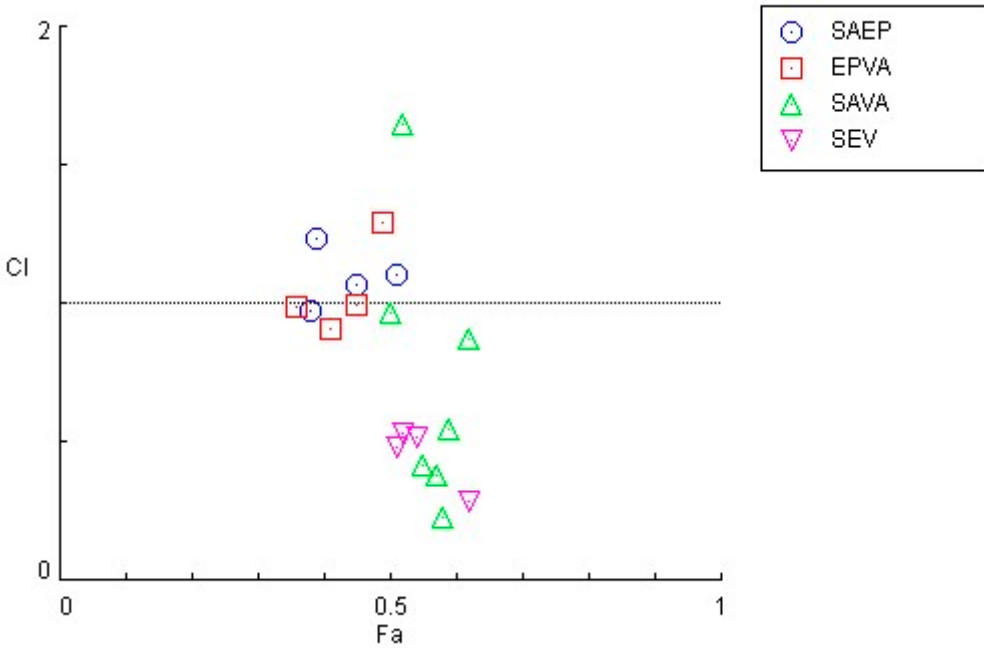

123  
 124  
 125 DRI Data for Non-Constant Combo: SAEP (SA+EP) Fa Dose SA

| Dose EP | DRI SA  | DRI EP  | Fa      | Dose SA |
|---------|---------|---------|---------|---------|
| 0.51    | 4.72880 | 10.1037 | 4.72880 | 1.12263 |
| 2.96783 | 5.44057 | 2.96783 | 1.36014 | 0.39    |
| 1.84125 | 2.88500 | 1.84125 | 1.44250 | 0.38    |
| 1.69671 | 2.58802 | 1.69671 | 2.58802 |         |

126  
 127 DRI Data for Non-Constant Combo: EPVA (EP+VA) Fa Dose EP

| Dose VA | DRI EP  | DRI VA  | Fa      | Dose EP |
|---------|---------|---------|---------|---------|
| 0.49    | 8.22447 | 5.02392 | 0.91383 | 5.02392 |
| 5.44057 | 3.78984 | 1.36014 | 3.78984 | 0.41    |
| 3.57473 | 2.84575 | 1.78737 | 2.84575 | 0.36    |
| 2.07544 | 1.96389 | 2.07544 | 1.96389 |         |

128  
 129 DRI Data for Non-Constant Combo: SAVA (SA+VA) Fa Dose SA

| Dose VA | DRI SA | DRI VA |
|---------|--------|--------|
|---------|--------|--------|

|           |                |                |               |               |      |
|-----------|----------------|----------------|---------------|---------------|------|
| 0.52      | 5.10982        | 6.20177        | 5.10982       | 0.68909       |      |
| <b>Fa</b> | <b>Dose SA</b> | <b>Dose VA</b> | <b>DRI SA</b> | <b>DRI VA</b> |      |
| 0.5       | 4.37645        | 5.38922        | 4.37645       | 1.34730       |      |
| 0.55      | 6.45365        | 7.66355        | 6.45365       | 3.83178       | 0.58 |
| 8.17419   | 9.49442        | 8.17419        | 9.49442       | 0.57          |      |
| 7.55172   | 8.83663        | 3.77586        | 8.83663       | 0.59          |      |
| 8.85260   | 10.2060        | 2.21315        | 10.2060       |               |      |
| 0.62      | 11.2885        | 12.7217        | 1.25428       | 12.7217       |      |

130

131 DRI Data for Non-Constant Combo: SEV (SA+EP+VA)

|           |                |                |                |               |               |               |
|-----------|----------------|----------------|----------------|---------------|---------------|---------------|
| <b>Fa</b> | <b>Dose SA</b> | <b>Dose EP</b> | <b>Dose VA</b> | <b>DRI SA</b> | <b>DRI EP</b> | <b>DRI VA</b> |
| 0.51      | 4.72880        | 10.1037        | 5.78107        | 4.72880       | 10.1037       | 5.78107       |
|           | 0.62           | 11.2885        | 32.1085        | 12.7217       | 5.64424       | 32.1085       |
|           | 12.7217        | 0.54           | 5.96906        | 13.7688       | 7.14005       | 5.96906       |
|           | 13.7688        | 3.57003        |                |               |               |               |
| 0.52      | 5.10982        | 11.1996        | 6.20177        | 5.10982       | 5.59979       | 6.20177       |

132

133

134

## Summary Table

**Experiment Name:** combination effect

**Date:**

**File Name:** E:\koori\combination report.cse

**Description**

**Drug:** syringic acid (SA) [ug/mL]

**Drug:** Epicatechin (EP) [ug/mL]

**Drug:** Vanilic acid (VA) [ug/mL]

**Drug Combo:** combination 1 (SAEP) (SA+EP)

**Drug Combo:** combination 2 (EPVA) (EP+VA)

**Drug Combo:** combination 3 (SAVA) (SA+VA)

**Drug Combo:** combination 4 (SEV) (SA+EP+VA)

136

| <b>Drug/Combo</b> | <b>Dm</b> | <b>m</b> | <b>r</b> |
|-------------------|-----------|----------|----------|
| SA                | 4.37645   | 0.51665  | 0.98401  |
| EP                | 9.11578   | 0.38880  | 0.99706  |
| VA                | 5.38922   | 0.56997  | 0.99767  |

137

CI values at:  
**Combo ED50 ED75 ED90 ED95**

138

139

Data for Fa = 0.5  
**Drug/Combo CI value Dose SA Dose EP Dose VA**

|    |         |         |
|----|---------|---------|
| SA | 4.37645 |         |
| EP | 9.11578 |         |
| VA |         | 5.38922 |

140

141 Data for Fa = 0.75

**Drug/Combo CI value Dose SA Dose EP Dose VA**

|    |         |         |
|----|---------|---------|
| SA | 36.6956 |         |
| EP | 153.796 |         |
| VA |         | 37.0366 |

142

143 Data for Fa = 0.9

**Drug/Combo CI value Dose SA Dose EP Dose VA**

|    |         |         |
|----|---------|---------|
| SA | 307.684 |         |
| EP | 2594.76 |         |
| VA |         | 254.529 |

144

145 Data for Fa = 0.95

**Drug/Combo CI value Dose SA Dose EP Dose VA**

|    |         |         |
|----|---------|---------|
| SA | 1306.81 |         |
| EP | 17731.2 |         |
| VA |         | 944.257 |

146

147 Data for Fa = 0.97

**Drug/Combo CI value Dose SA Dose EP Dose VA**

|    |         |         |
|----|---------|---------|
| SA | 3656.99 |         |
| EP | 69598.8 |         |
| VA |         | 2399.92 |

148

149

150

151
